# Supplementary material for: Impact of Entrepreneurship on Innovation Performance of Chinese SMEs: Focusing on the Mediating Effect of Enterprise Dynamic Capability and Organizational Innovation Environment
Source: MDPI journal article supplement (doi:10.3390/su141912063), 2022-09-23
Supplement: s1 [file s1]

Archive with 1 entries (1 files):
- sustainability-1914219-supplementary.pdf
